# Supplementary material for: Intestinal bitter taste receptor activation alters hormone secretion and imparts metabolic benefits
Source: PubMed Central journal article supplement (PMC6158035; doi:10.1016/j.molmet.2018.07.013), 2018-08-04
Supplement: mmc1.pdf [file mmc1.pdf]

## SUPPLEMENTARY FIGURES

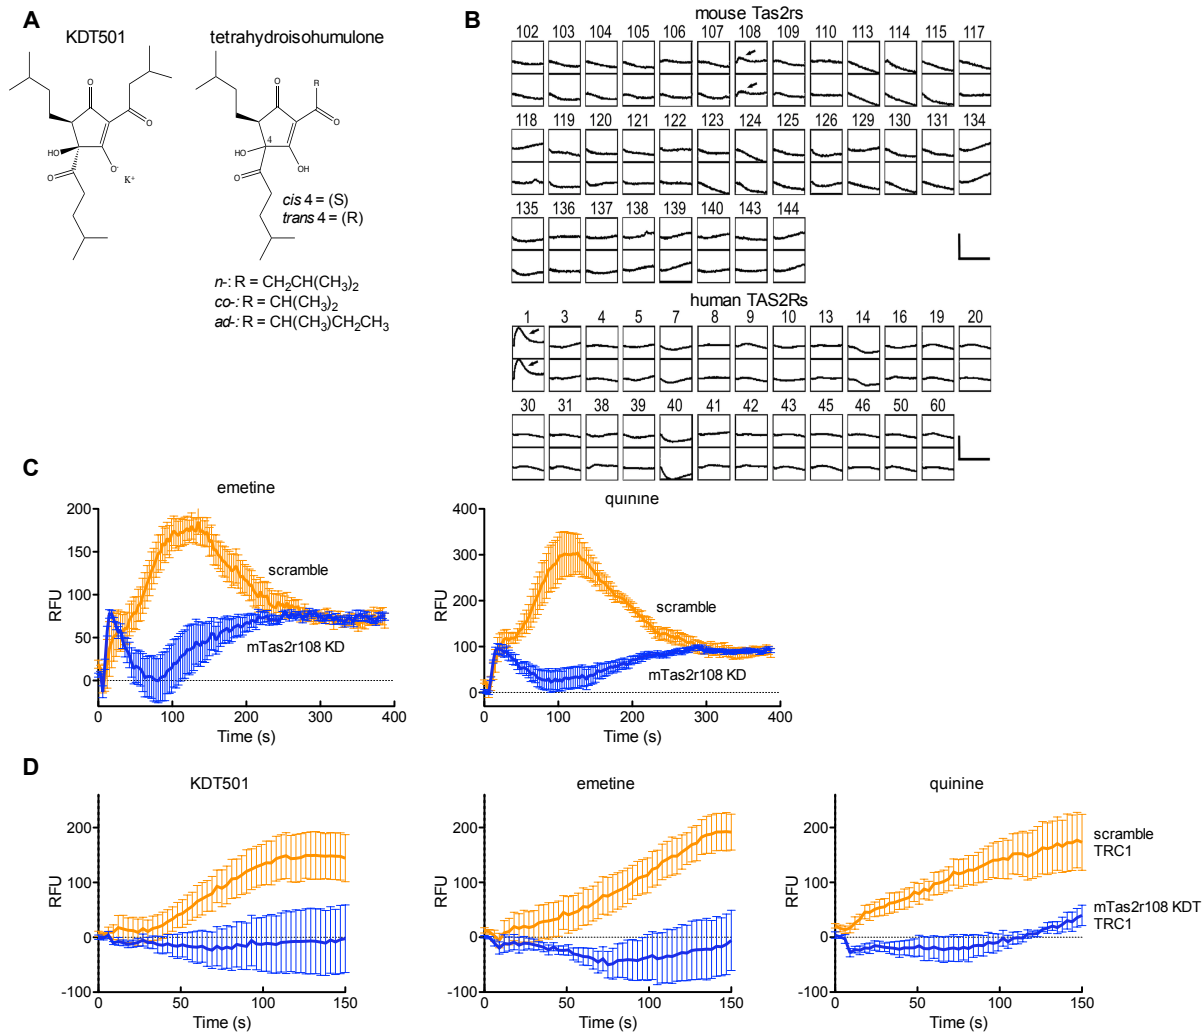

**Figure S1. KDT501 is a selective agonist of mouse Tas2r108 and human TAS2R1.**

(A) Chemical structures of KDT501 and the tetrahydroisohumulone mixture used in this study.

(B) Representative intracellular calcium traces ( $n = 3$ ) of the response of 34 recombinant mouse and 25 human bitter taste receptors to 10  $\mu\text{M}$  KDT501 tested using HEK293 cells stably-expressing a G $\alpha$ 15-gustducin chimera and transiently transfected with the indicated receptor. Calcium traces are shown after mock subtraction. Specific signals are denoted by arrows. Scale bars: y-axis = 3000 relative fluorescence units (RFU); x-axis = 300 s.

(C) Intracellular calcium mobilization response to Tas2r108 agonists (30  $\mu\text{M}$  emetine and 20  $\mu\text{M}$  quinine) in STC-1 cells expressing scramble lentiviral shRNA or targeting endogenous Tas2r108 using a second generation (TRC2) vector as shown in the main figures. The response to these known Tas2r108 agonists is abolished in cells depleted of Tas2r108 ( $n = 4$ ).

(D) Intracellular calcium mobilization response to KDT501 (10  $\mu\text{M}$ ) and known Tas2r108 agonists (30  $\mu\text{M}$  emetine and 20  $\mu\text{M}$  quinine) in STC-1 cells expressing scramble lentiviral shRNA or targeting endogenous Tas2r108 using a distinct first generation (TRC1) vector ( $n = 4$ ). Data are presented as means  $\pm$  SEM.

**A** *Chga* co-localization ■ Tas2r108 positive  
 non-Tas2r108

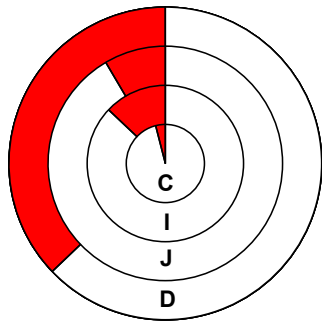

|                   | duodenum | jejunum | ileum | colon |
|-------------------|----------|---------|-------|-------|
| Tas2r108 positive | 37.1     | 8.5     | 12.9  | 4.0   |
| non-Tas2r108      | 62.9     | 91.5    | 87.1  | 96.0  |

**B** *Il25* co-localization ■ Tas2r108 positive  
 non-Tas2r108

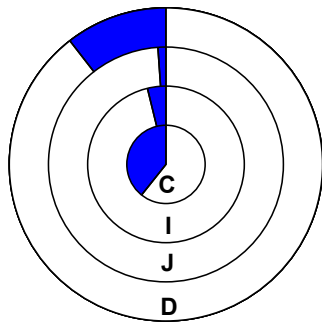

|                   | duodenum | jejunum | ileum | colon |
|-------------------|----------|---------|-------|-------|
| Tas2r108 positive | 10.5     | 1.1     | 3.8   | 39.3  |
| non-Tas2r108      | 89.5     | 98.9    | 96.2  | 60.7  |

**C** *Tas2r108* co-localization ■ EEC co-localization  
■ Tuft co-localization  
 non-EEC or Tuft

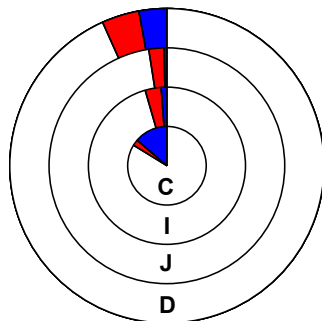

|                      | duodenum | jejunum | ileum | colon |
|----------------------|----------|---------|-------|-------|
| EEC co-localization  | 3.9      | 2.1     | 3.3   | 2.5   |
| Tuft co-localization | 2.9      | 0.4     | 1.2   | 13.8  |
| other                | 93.3     | 97.5    | 95.5  | 83.8  |

**Figure S2. RNAscope analysis of *Tas2r108* expression in the intestine and co-localization with enteroendocrine and tuft cell markers.**

(A and B) Percentage of (A) enteroendocrine cells (chromogranin A positive), and (B) Tuft cells (IL-25 positive) that express *Tas2r108*. D = duodenum; J = jejunum; I = ileum; C = colon.

(C) Percentage of *Tas2r108* positive cells that express enteroendocrine or Tuft cell markers.

Analysis was performed on three 200  $\mu\text{m}$  x 200  $\mu\text{m}$  sections. At least 60 chromogranin A, 90 IL-25, and 240 *Tas2r108* positive cells were counted for each small intestine region. 50 chromogranin A, 28 IL-25, and 80 *Tas2r108* positive cells were counted in colon sections.

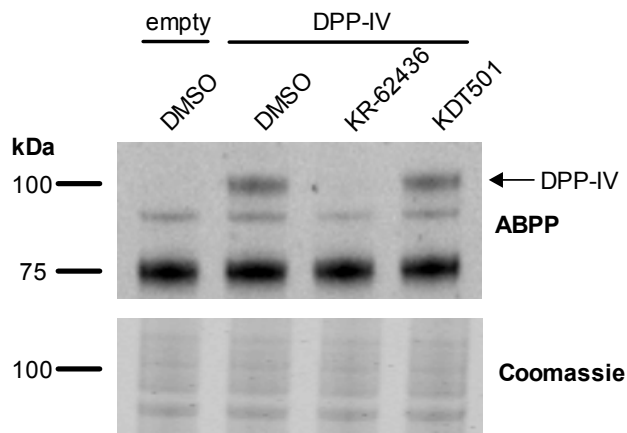

**Figure S3. KDT501 does not inhibit dipeptide peptidase IV (DPP-IV).**  
 Competitive gel-based activity-based protein profiling analysis of HEK 293T lysates overexpressing DPP-IV. Proteomes were incubated with DMSO, 5  $\mu$ M KR-62436, or 75  $\mu$ M KDT501 prior to the addition of a rhodamine-labeled fluorophosphonate probe (*top panel*). Protein loading was verified by Coomassie staining (*bottom panel*).

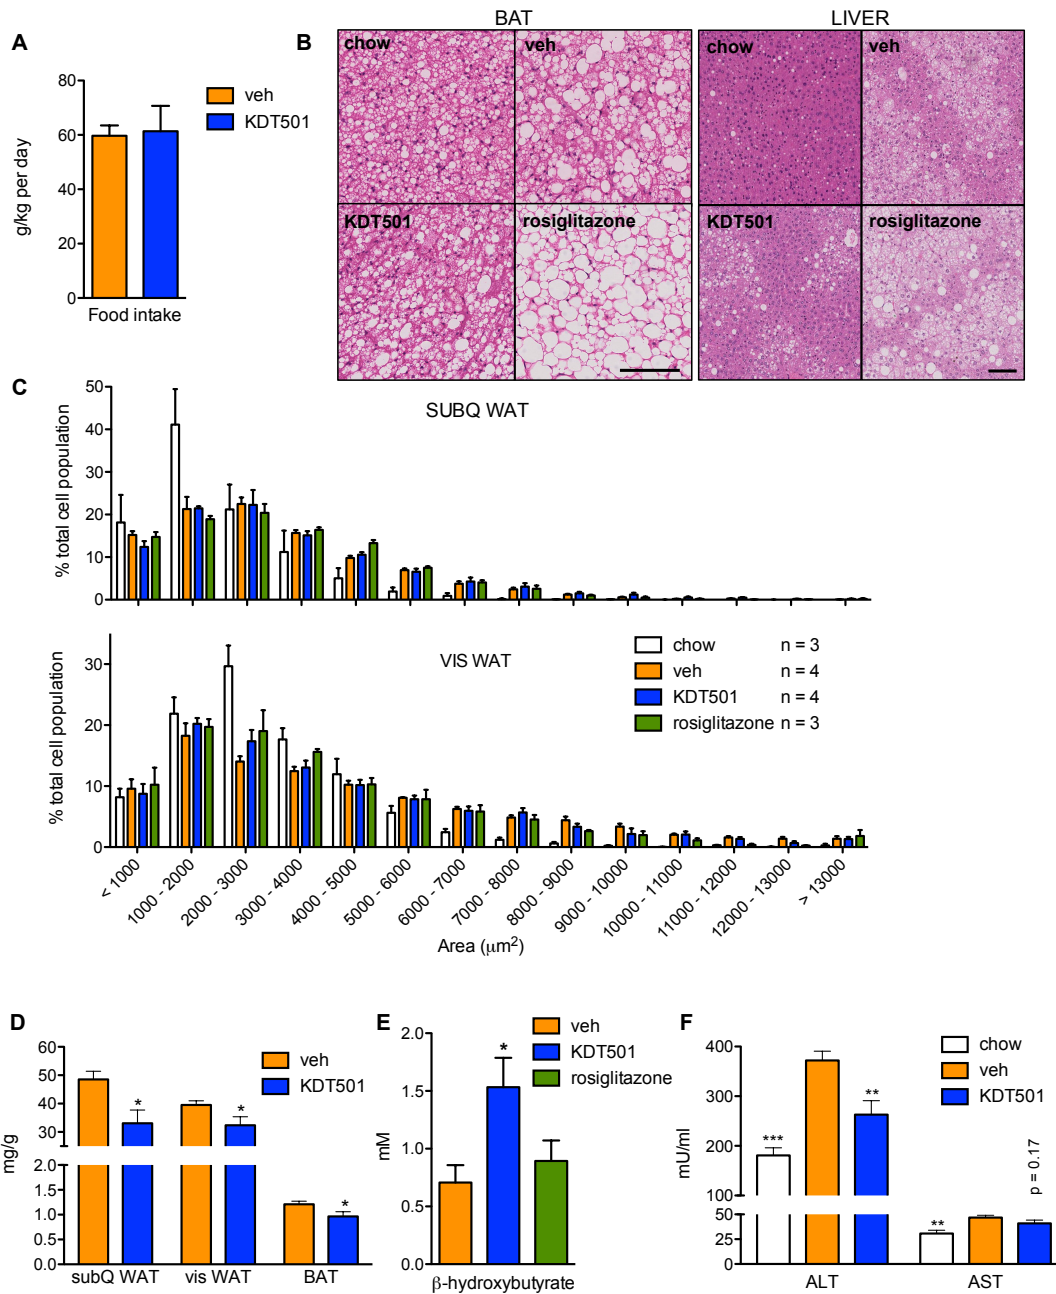

**Figure S4. Effect of KDT501 treatment on food intake, BAT and liver morphology, adipocyte size, plasma ketone bodies, and liver enzymes.**

(A) Food intake in CLAMS (comprehensive lab animal monitoring system) cages (n = 7).

(B) Representative brown adipose tissue (BAT) and liver H&E sections from DIO mice treated with vehicle, KDT501, or rosiglitazone, and matched normal chow controls. Scale bar = 100 μm.

(C) Adipocyte size distribution (subQ: subcutaneous, vis: visceral) from the mice shown in Figure 4 and matched chow controls (n as shown), and (D) adipose depot weights normalized to body weights (n = 6-8).

(E and F) Plasma β-hydroxybutyrate (E), and ALT and AST (F) levels in treated DIO mice (n ≥ 6). Data are presented as means ± SEM. Statistical significance was calculated using one-way ANOVA in D and E. \*p < 0.05, \*\*p < 0.01, \*\*\*p < 0.001 relative to vehicle-treated mice.

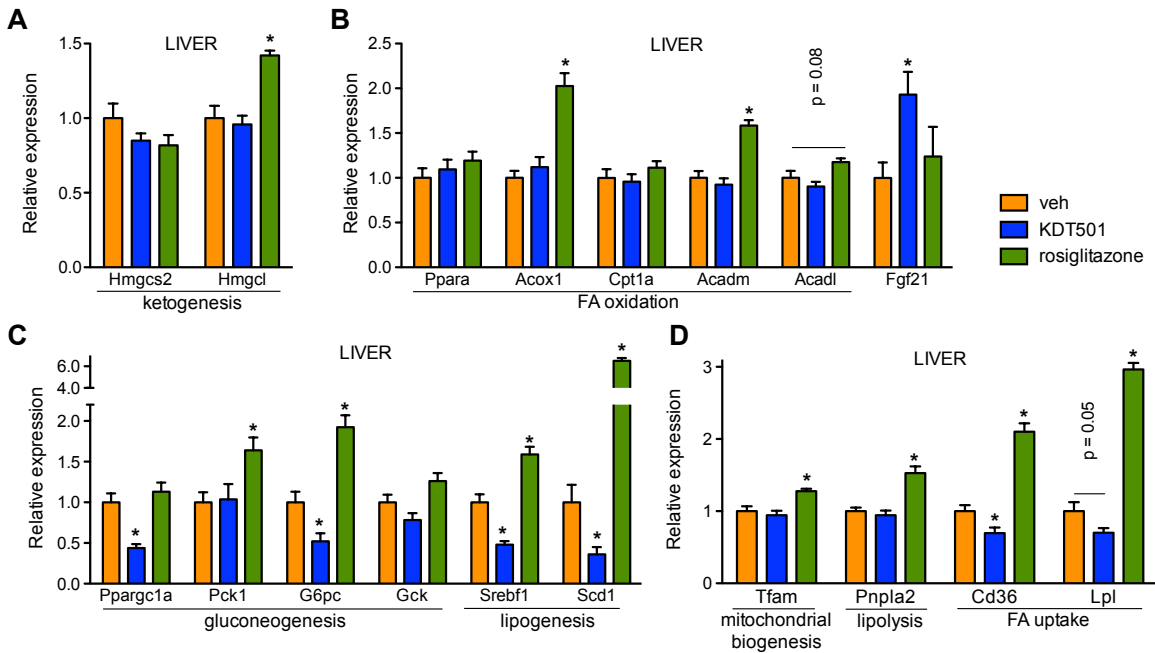

**Figure S5. Changes in hepatic gene expression elicited by KDT501 treatment.**

(A to D) Liver mRNA levels of genes involved in ketogenesis (A), fatty acid (FA) oxidation (B), gluconeogenesis, lipogenesis (C), and mitochondrial biogenesis, lipolysis, and fatty acid uptake (D) in DIO mice treated with vehicle, KDT501, or rosiglitazone ( $n \geq 7$ )

Data are presented as means  $\pm$  SEM. Statistical significance was calculated using one-way ANOVA. \* $p < 0.05$  relative to vehicle-treated mice.

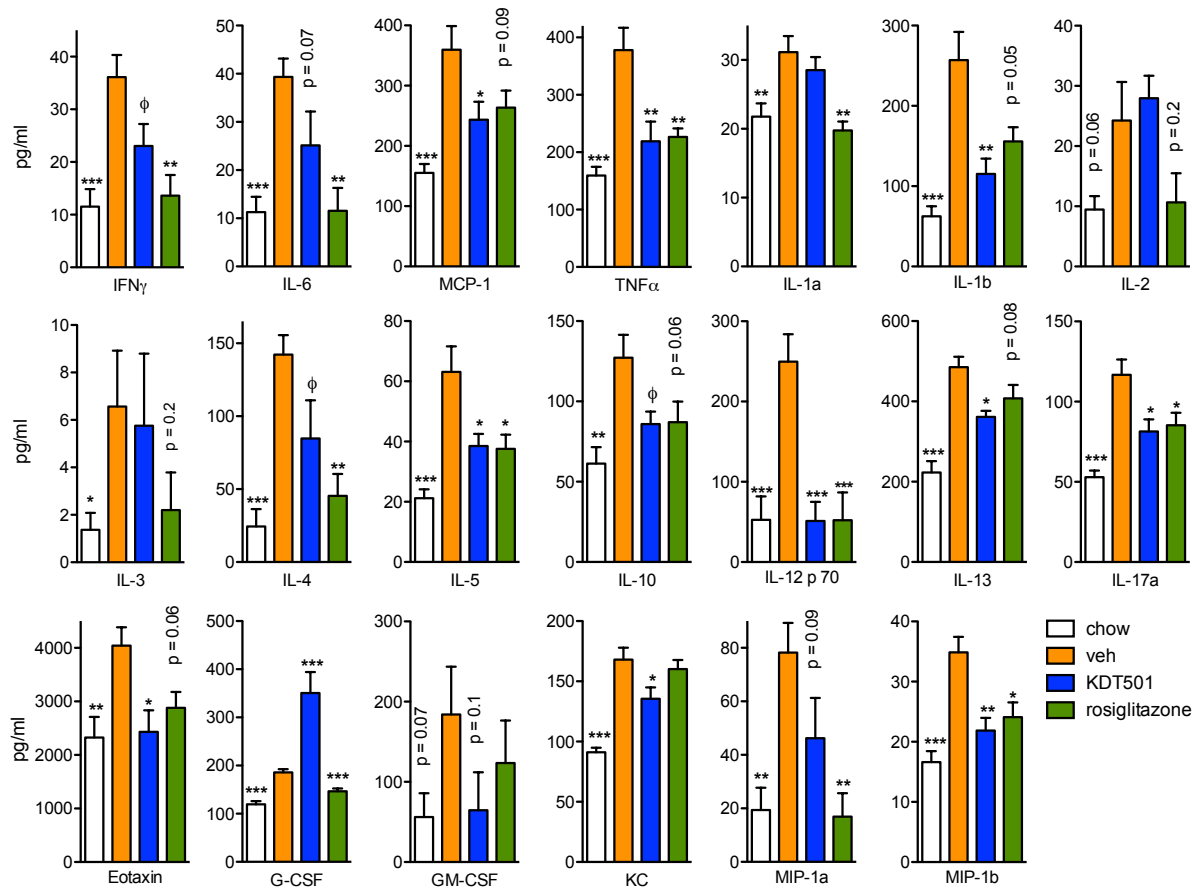

**Figure S6. KDT501 treatment has a broad anti-inflammatory effect.**

Plasma levels of multiple proinflammatory cytokines and chemokines elevated in DIO are reduced by KDT501 treatment. Measurements were performed in vehicle, KDT501, or rosiglitazone-treated DIO mice and matched chow controls (n  $\geq$  8).

Data are presented as means  $\pm$  SEM. Statistical significance was calculated using one-way ANOVA (\*p < 0.05, \*\*p < 0.01, \*\*\*p < 0.001), or Student's t test ( $\phi$ p < 0.05) relative to vehicle-treated mice.

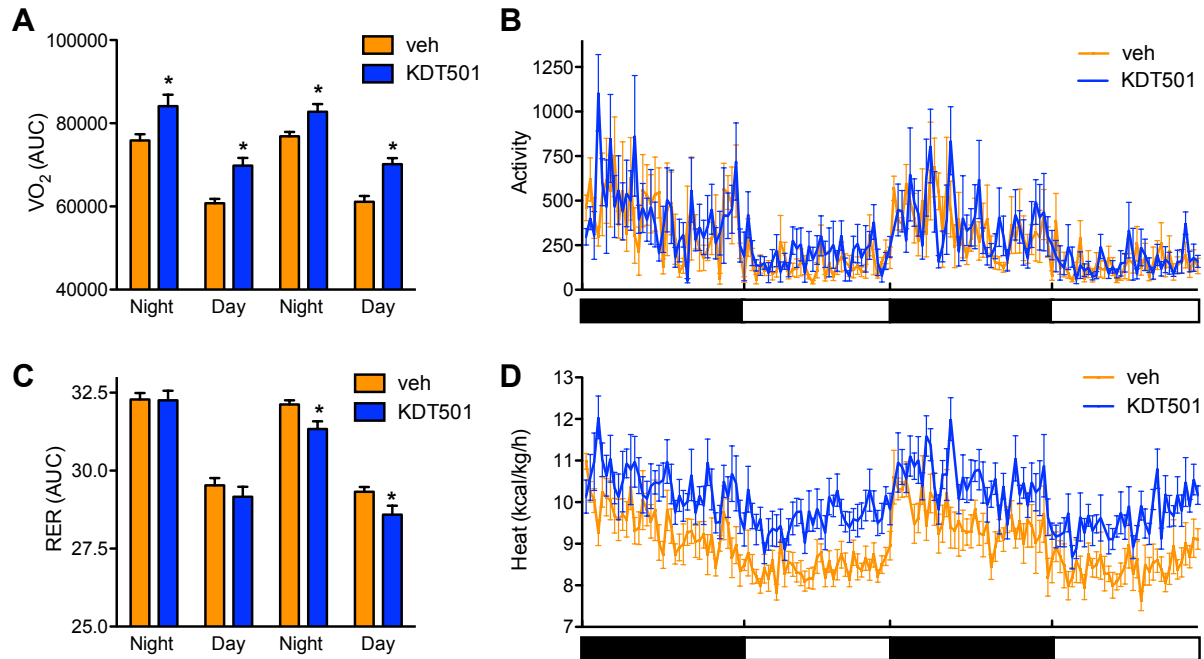

**Figure S7. KDT501 treatment increases energy expenditure and heat production without changes in activity.**

(A to D) Area under curve (AUC) analysis of oxygen consumption rate measurements (A), locomotor activity (B), respiratory exchange ratio (RER) AUC analysis (C), and heat production (D) in mice described in Figure 5 ( $n = 7$ ).

Data are presented as means  $\pm$  SEM. Statistical significance was calculated using Student's  $t$  test. \* $p < 0.05$  relative to vehicle-treated mice.

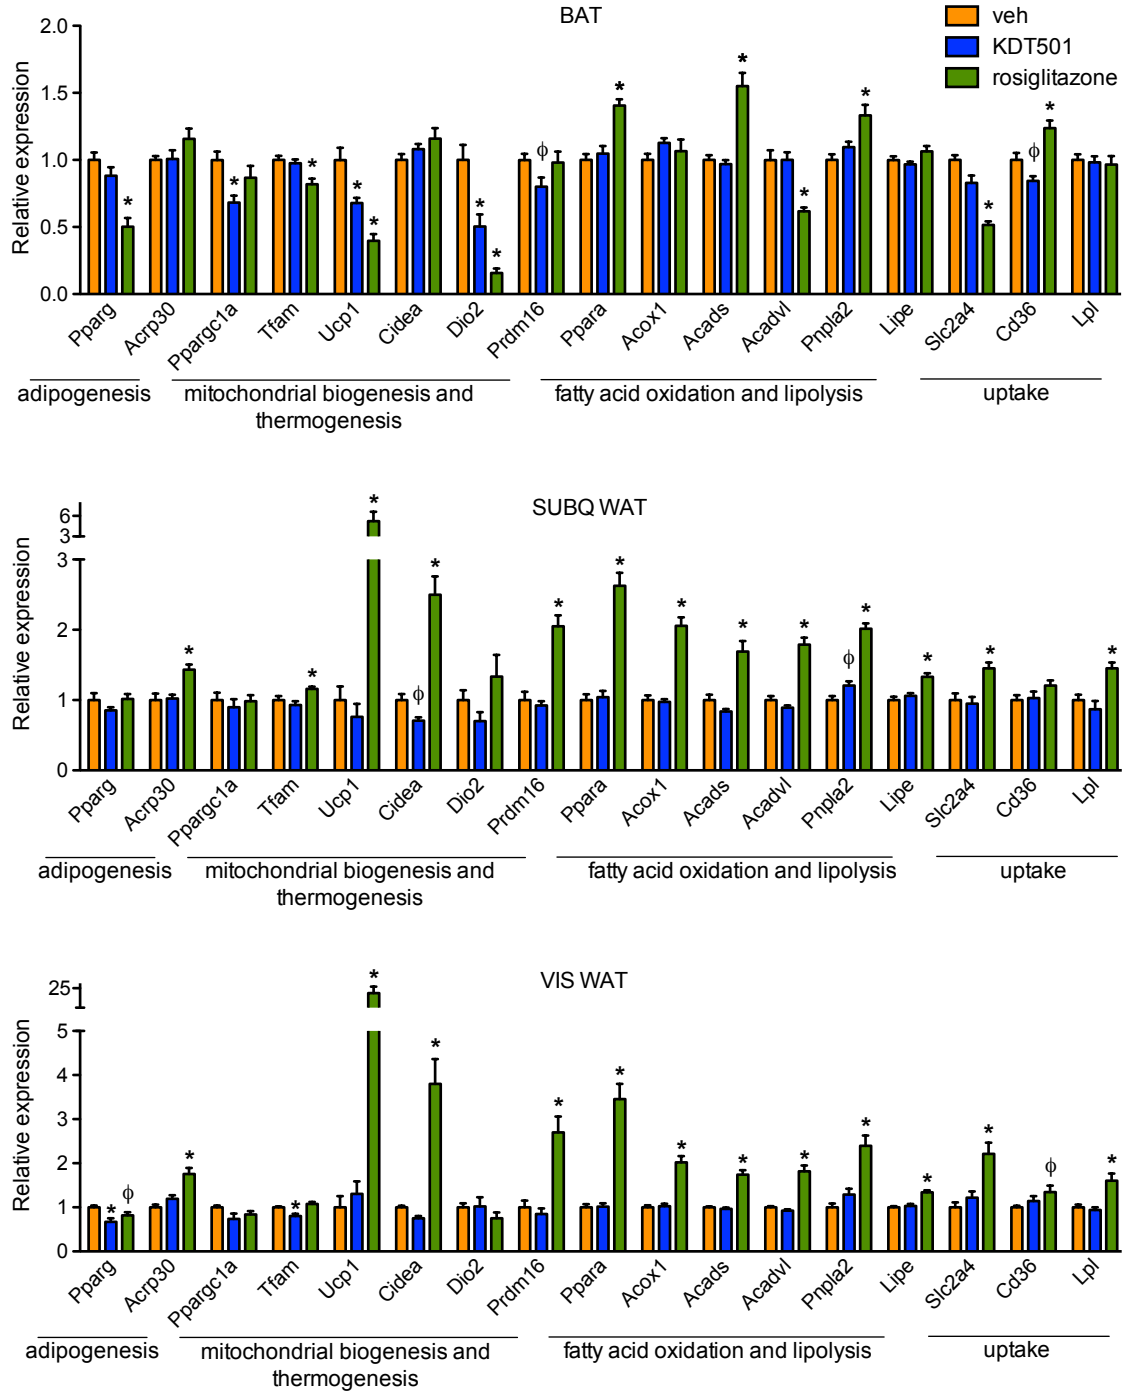

**Figure S8. KDT501 does not alter adipose tissue gene expression.**

RNA levels of genes involved in adipogenesis, mitochondrial biogenesis, thermogenesis, fatty acid oxidation, lipolysis, and substrate uptake were measured in brown adipose tissue (BAT), subcutaneous white adipose tissue (subQ WAT), and visceral WAT (vis WAT) of vehicle, KDT501, and rosiglitazone-treated DIO mice ( $n \geq 7$ ).

Data are presented as means  $\pm$  SEM. Statistical significance was calculated using one-way ANOVA (\* $p < 0.05$ ) or Student's  $t$  test ( $\phi p < 0.05$ ) relative to vehicle-treated mice.



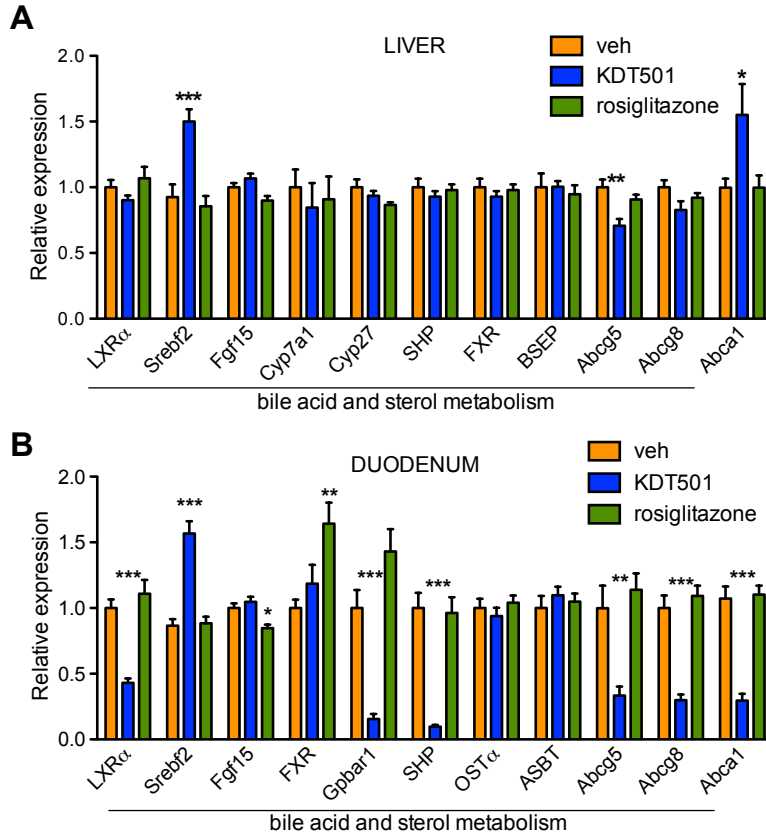

**Figure S9. Effect of KDT501 treatment on expression of bile acid and sterol metabolism genes.**

(A) Hepatic and (B) intestinal RNA levels were measured in vehicle, KDT501, and rosiglitazone-treated DIO mice ( $n \geq 7$ ).

Data are presented as means  $\pm$  SEM. Statistical significance was calculated using one-way ANOVA. \* $p < 0.05$ , \*\* $p < 0.01$ , \*\*\* $p < 0.001$  relative to vehicle-treated mice.

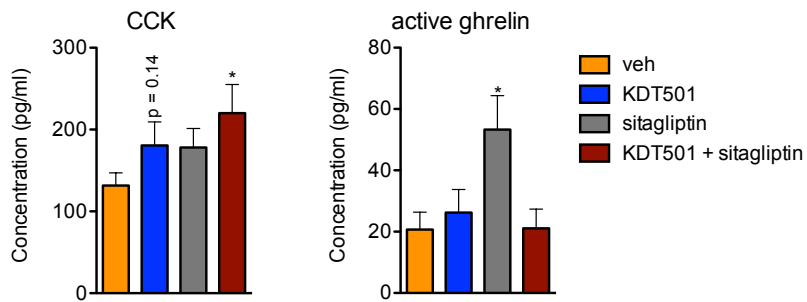

**Figure S10. Effect of short-term KDT501 treatment on plasma ghrelin and CCK levels.** (A) Plasma CCK and (B) active ghrelin levels in DIO mice treated for 4 days with vehicle, 150 mg/kg KDT501, 4 mg/kg sitagliptin, or the combination ( $n \geq 6$ ). Data are presented as means  $\pm$  SEM. Statistical significance was calculated using one-way ANOVA (\* $p < 0.05$ ) relative to vehicle-treated mice.

**TABLE S1: PRIMERS AND PROBES FOR QPCR ANALYSIS.**

| Gene            |                             | Primers or catalog no.                                                             |
|-----------------|-----------------------------|------------------------------------------------------------------------------------|
| <i>36B4</i>     | Forward<br>Reverse<br>Probe | AGATGCAGCAGATCCGCAT<br>GTTCTTGCCCATCAGCACC<br>CGCTCCGAGGGAAGGCCG                   |
| <i>Ppara</i>    | Forward<br>Reverse<br>Probe | AGTACTTAGGAAGCTGTCCG<br>TCGATGTTCAGGGCACT<br>ATCACAGACACCCTCTCTCCAGC               |
| <i>Acox1</i>    | Forward<br>Reverse<br>Probe | CATATGACCCCAAGACCCAAG<br>CATGTAACCCGTAGCACTCC<br>ACTTCCAATCATGCGATAGTCCTGGC        |
| <i>Cpt1a</i>    | Forward<br>Reverse<br>Probe | CCAAGTATCTGGCAGTCGA<br>CGCCACAGGACACATAGT<br>CATGGCTCAGACAGTACCTCCTTCA             |
| <i>Acadm</i>    | Forward<br>Reverse<br>Probe | ACCCAGATCCTAAAGTACCC<br>CGAAAGCAATTCCTCTGGTG<br>TGGCCCATGTTTAGTTCTTTTTTCCAA        |
| <i>Acadl</i>    | Forward<br>Reverse<br>Probe | GAAACCAGGAACTACGTGAAG<br>GCTGTCCACAAAAGCTCT<br>CACACATACAGACGGTGCAGCATA            |
| <i>Acads</i>    | Forward<br>Reverse<br>Probe | ATCCCAAGGAGAACCTG<br>GCATACTTCACAGCACAAATCC<br>CAAAATAGCCATGCAAACCCTGGACA          |
| <i>Acadvl</i>   | Forward<br>Reverse<br>Probe | ATCCGAAGCTCAGCCATA<br>CCGTGGCTGCATCTTTAA<br>CCCCATTACTGATCCAGATCTTGCT              |
| <i>Ppargc1a</i> | Forward<br>Reverse<br>Probe | CATTTGATGCACTGACAGATGGA<br>GTCAGGCATGGAGGAAGGAC<br>CCGTGACCACTGACA ACGAGGCC        |
| <i>Pck1</i>     | Forward<br>Reverse<br>Probe | TTGAACTGACAGACTCGCCCT<br>TGCCCATCCGAGTCATGA<br>CCGCATGCTGGCCACCAC                  |
| <i>Sreb1</i>    | Forward<br>Reverse<br>Probe | ATGGATTGCACATTTGAAGACATGCT<br>CCTGTGTCCCCTGTCTCAC<br>CTTCCCGGGCCTGTTTGACGCCCCCTA   |
| <i>Scd1</i>     | Forward<br>Reverse<br>Probe | CTCCTGCTGATGTGCTTCAT<br>AAGGTGCTAACGAACAGGCT<br>TGTTTACAAAAGTCTCGCCCCAGCA          |
| <i>Tfam</i>     | Forward<br>Reverse<br>Probe | CACCCAGATGCAAACTTTTCAG<br>CTGCTCTTTATACTTGCTCACAG<br>CCACAGGGCTGCAATTTTCCTAACC     |
| <i>Pnpla2</i>   | Forward<br>Reverse<br>Probe | ATATCCCCTTTAGCTCCAAGG<br>CAAGTTGTCTGAAATGCCGC<br>ATTTATCCCGGTGTACTGTGGCCTC         |
| <i>Lipe</i>     | Forward<br>Reverse<br>Probe | GCTCCCTTTCCCCGA<br>ATGCAGAGATTCCCACCT<br>CACTGTGACCTGCTTGGTTCAACT                  |
| <i>Slc2a4</i>   | Forward<br>Reverse<br>Probe | TGTCGCTGGTTTCTCCAACCTG<br>CCATACGATCCGCAACATACTG<br>ACCTGTAACCTTCATTGTGCGCATGGGTTT |

|                       |                             |                                                                              |
|-----------------------|-----------------------------|------------------------------------------------------------------------------|
| <i>Cd36</i>           | Forward<br>Reverse<br>Probe | GCGACATGATTAATGGCACAG<br>GATCCGAACACAGCGTAGATAG<br>CAACAAAAGGTGGAAAGGAGGCTGC |
| <i>Lpl</i>            | Forward<br>Reverse<br>Probe | GCCATGACAAGTCTCTGAAG<br>CTTTCAAACACCCAAACAAGG<br>AGTCTGGCTGACACTGGACAAACA    |
| <i>Pparg</i>          | Forward<br>Reverse<br>Probe | TGTTATGGGTGAAACTCTGGG<br>TCTTGTGAAGTGCTCATAGGC<br>CCATGCTCTGGGTCAACAGGAGAAT  |
| <i>Acrp30</i>         | Forward<br>Reverse<br>Probe | AGGCATCCCAGGACATC<br>CCTGTCATTCCAACATCTCC<br>CCTTAGGACCAAGAAGACCTGCATCTC     |
| <i>Ucp1</i>           | Forward<br>Reverse<br>Probe | GAGCTGGTAACATATGACCTC<br>GAGCTGACAGTAAATGGCA<br>ACAAAATACTGGCAGATGACGTCCC    |
| <i>Cidea</i>          | Forward<br>Reverse<br>Probe | CACGCATTTTCATGATCTTGG<br>CCTGTATAGGTCGAAGGTGA<br>TTACTACCCGGTGTCCATTTCTGTCC  |
| <i>Dio2</i>           | Forward<br>Reverse<br>Probe | CTGTGTCTGGAACAGCTT<br>CACTGGAATTGGGAGCAT<br>CTAGATGCCTACAAACAGGTTAAACTGGGT   |
| <i>Prdm16</i>         | Forward<br>Reverse<br>Probe | CAGCACGGTGAAGCCATTC<br>GCGTGCATCCGCTTGTG<br>AGAACTGCGTGTAGGACTTGTGGC         |
| <i>Lxra</i>           | Forward<br>Reverse<br>Probe | CAACAGTGTAACAGGCGCT<br>TGCAATGGGCCAAGGC<br>TCAGACCGCCTGCGCGTC                |
| <i>Cyp27</i>          | Forward<br>Reverse<br>Probe | GGAGGGCAAGTACCCAATAA<br>GCGATGAAGATCCCATAGGT<br>CCACCGAGACCACAAGGGCC         |
| <i>Abcg5</i>          | Forward<br>Reverse<br>Probe | CTCTATCAGCTTGTGGGTG<br>CCACTTATGATACAGGCCATC<br>CTCAGCATGGGAAACAGATTCACAGC   |
| <i>Abcg8</i>          | Forward<br>Reverse<br>Probe | TGGTCAGTCCAACACTCT<br>CTCAAACCAAGGCACCT<br>AGAGGCGATGTCCACCTGGTAG            |
| <i>Abca1</i>          | Forward<br>Reverse<br>Probe | GGTTTGGAGATGGTTATACAATAGTTGT<br>CCCGAAACGCAAGTCC<br>CGAATAGCAGGCTCCAACCCTGAC |
| <i>Hmgcs2</i>         | Applied Biosystems          | Mm00550050_m1                                                                |
| <i>Hmgcl</i>          | Applied Biosystems          | Mm00468667_m1                                                                |
| <i>G6pc</i>           | Applied Biosystems          | Mm00839363_m1                                                                |
| <i>Gck</i>            | Applied Biosystems          | Mm00439129_m1                                                                |
| <i>Srebf2</i>         | Applied Biosystems          | Mm01306292_m1                                                                |
| <i>Cyp7a1</i>         | Applied Biosystems          | Mm00484152_m1                                                                |
| <i>Fgf15</i>          | Applied Biosystems          | Mm00433278_m1                                                                |
| <i>Gpbar1</i>         | Applied Biosystems          | Mm04212121_s1                                                                |
| <i>Nr0b2</i><br>(SHP) | Applied Biosystems          | Mm00442278_m1                                                                |

|                                  |                    |               |
|----------------------------------|--------------------|---------------|
| <i>Nr1h4</i><br>(FXR)            | Applied Biosystems | Mm00436425_m1 |
| <i>Abcb11</i><br>(BSEP)          | Applied Biosystems | Mm00445168_m1 |
| <i>Slc51a</i><br>(OST $\alpha$ ) | Applied Biosystems | Mm00521530_m1 |
| <i>Slc10a2</i><br>(ASBT)         | Applied Biosystems | Mm00488258_m1 |
